# Supplementary material for: Characterization of Single-Nucleus Electrical Properties by Microfluidic Constriction Channel
Source: PubMed Central journal article supplement (PMC6915630; doi:10.3390/mi10110740), 2019-10-31
Supplement: micromachines-10-00740-s001.pdf [file micromachines-10-00740-s001.pdf]

**Table S1.** A summary of previously reported electrical parameters of single nuclei.

| Nuclear type                                       | Specification                      | $\epsilon_{ne}$ | $C_{ne}$<br>( $\mu\text{F}/\text{cm}^2$ ) | $R_{ne}$ ( $\Omega\cdot\text{cm}^2$ ) | $\sigma_{ne} \times 10^{-3}$ (S/m) | $\epsilon_{np}$ | $\sigma_{np}$<br>(S/m) | Reference |
|----------------------------------------------------|------------------------------------|-----------------|-------------------------------------------|---------------------------------------|------------------------------------|-----------------|------------------------|-----------|
| Drosophila flavorepleta larvae salivary gland cell |                                    |                 | $412 \pm 62$                              | $1.5 \pm 0.4$                         |                                    |                 |                        | [1]       |
| Drosophila flavorepleta salivary gland cell        | In situ                            |                 | $\sim 100$                                | $3.9 \pm 1.4$                         |                                    |                 |                        | [2]       |
| Drosophila flavorepleta salivary gland cell        | In semi-isolation                  |                 | $\sim 100$                                | $1.5 \pm 0.3$                         |                                    |                 |                        |           |
| Drosophila flavorepleta salivary gland cell        |                                    |                 |                                           | $1.5 \pm 0.4$                         |                                    |                 |                        | [3]       |
| Xenopus laevis oocyte                              |                                    |                 |                                           | $< 0.001$                             |                                    |                 |                        |           |
| Triturus viridescens oocyte                        |                                    |                 |                                           | $< 0.001$                             |                                    |                 |                        |           |
| Marine oocyte                                      |                                    |                 |                                           | $< 0.001$                             |                                    |                 |                        | [4]       |
| Midge chironomus thummi salivary gland cell        | Normal                             |                 |                                           | $0.72 \pm 0.09$                       |                                    |                 |                        | [5]       |
| Chironomus salivary gland cell                     | Ecdysone                           |                 |                                           | $1.38 \pm 0.1$                        |                                    |                 |                        | [6]       |
| Murine lymphoma cell (L5178Y)                      |                                    | $19 \pm 2$      | $0.43 \pm 0.03$                           | 2                                     | $0.7 \pm 0.2$                      | $308 \pm 20$    | $0.8 \pm 0.04$         | [7]       |
| Mouse liver cell                                   | In situ                            |                 |                                           | $0.59 \pm 0.33$                       |                                    |                 |                        | [8]       |
| Mouse spleen lymphocyte                            | In isolation                       | 28              | 0.62                                      | $0.28 \pm 0.23$                       | 6                                  | 52              | 1.35                   | [9]       |
| Madin-Darby canine kidney cell                     | Normal                             |                 |                                           | 1.4                                   |                                    |                 |                        | [10]      |
| Yeast cell                                         | Aldosterone                        |                 | $0.483 \pm 0.029$                         | 1.0                                   | $3.22 \pm 0.48$                    |                 |                        | [11]      |
|                                                    | Maxwell-wanger theory              |                 | $1.12 \pm 0.20$                           |                                       |                                    |                 | $3.35 \pm 1.50$        |           |
| Rat liver cell                                     | Effective medium theory (EMT)      |                 | $1.16 \pm 0.29$                           |                                       |                                    |                 | $2.58 \pm 0.54$        | [12]      |
|                                                    | EMT with dipole-dipole interaction |                 | $0.92 \pm 0.01$                           |                                       |                                    |                 | $1.70 \pm 0.10$        |           |
| Xenopus laevis oocyte                              |                                    |                 |                                           | 0.13                                  |                                    |                 |                        | [13]      |
| Human B-cell                                       | Normal                             | $106 \pm 35$    | $2.3 \pm 0.69$                            |                                       | $11.1 \pm 7.2$                     |                 | $2.04 \pm 0.29$        | [14,15]   |
|                                                    | Magala                             | $72.5 \pm 11.6$ | $1.6 \pm 0.48$                            |                                       | $3.7 \pm 0.9$                      |                 | $1.08 \pm 0.03$        |           |

|                         |                                  |                |              |             |              |               |                   |      |
|-------------------------|----------------------------------|----------------|--------------|-------------|--------------|---------------|-------------------|------|
|                         | Farage                           | 60.3 ± 22.6    | 1.3 ± 0.39   |             | 4.4 ± 2.5    |               | 1.07 ± 0.43       |      |
|                         | Raji                             | 79.9 ± 34.4    | 1.8 ± 0.54   |             | 4.0 ± 1.6    |               | 1.02 ± 0.25       |      |
|                         | Bjab                             | 108 ± 35       | 2.4 ± 0.72   |             | 2.1 ± 0.7    |               | 1.39 ± 0.54       |      |
|                         | Daudi                            | 66.1 ± 7.5     | 1.5 ± 0.45   |             | 2.7 ± 0.3    |               | 1.44 ± 0.35       |      |
|                         | Normal                           | 85.6 ± 16.7    | 1.9 ± 0.57   |             | 8.8 ± 0.6    |               | 1.26 ± 0.27       |      |
| Human T-cell            | Peer                             | 61.6 ± 17      | 1.4 ± 0.42   |             | 2.1 ± 0.6    |               | 1.42 ± 0.20       |      |
|                         | HDMAR                            | 101.2 ± 55.3   | 2.2 ± 0.66   |             | 3.0 ± 0.2    |               | 1.58 ± 0.28       |      |
| Eukaryotic cell         |                                  | 6.8 – 100 (41) |              |             | 0.083 – 7(3) | 32 – 300(120) | 0.25 – 2.2 (0.95) | [16] |
| Mammal skeletal myocyte | 0.3 GHz microwave                |                |              |             |              | 73.5          | 3.2               |      |
|                         | 1 GHz microwave                  |                |              |             |              | 61.6          | 3.6               | [17] |
|                         | 3 GHz microwave                  |                |              |             |              | 53.0          | 6.2               |      |
| Human jurkat cell       |                                  | 22.8           |              |             | 4.30         | 120           | 0.18              | [18] |
| Human jurkat cell       | Normal                           |                |              |             |              |               | 0.48–0.42         |      |
|                         | 1 min of pulse                   |                |              |             |              |               | 0.49–0.31         | [19] |
|                         | 20 min of pulse                  |                |              |             |              |               | 0.31–0.18         |      |
| Human jurkat cell       | Microfluidic device              |                | 1.57 ± 0.01  | 0.26 ± 0.06 |              |               | 0.63 ± 0.005      |      |
|                         | Time domain reflectometry system |                | 1.19 ± 0.14  | 0.21 ± 0.02 |              |               | 0.82 ± 0.06       | [20] |
| Human hepatocyte        |                                  | 19.2           |              |             |              |               | 1.85              | [21] |
| Human jurkat cell       |                                  |                |              |             | 1.75–2.25    |               |                   | [22] |
| Human jurkat cell       |                                  |                | 0.32 ± 0.002 | 6.37 ± 0.04 |              |               | 37.99 ± 8.09      |      |
| Mouse B16 cell          |                                  |                | 0.18 ± 0.11  | 7.81 ± 4.39 |              |               | 9.16 ± 0.63       | [23] |
| Rat H9C2 cell           |                                  |                | 0.22 ± 0.05  | 7.25 ± 0.68 |              |               | 17.2 ± 8.53       |      |

|                              |                       |             |             |           |             |           |
|------------------------------|-----------------------|-------------|-------------|-----------|-------------|-----------|
| Human PC5 cell               |                       | 0.16 ± 0.02 | 5.24 ± 1.98 |           | 27.3 ± 4.61 |           |
| Human PC6 cell               |                       | 0.12 ± 0.02 | 9.26 ± 4.14 |           | 8.44 ± 3.48 |           |
| Human B16 cell               | Normal                | 1.01 ± 0.56 | 2.65 ± 2.96 |           | 0.35 ± 0.31 |           |
|                              | Gadolinium            | 1.51 ± 0.51 | 1.21 ± 0.80 |           | 0.57 ± 0.33 |           |
| Human H9C2 cell              | Normal                | 1.38 ± 0.13 | 0.58 ± 0.29 |           | 0.44 ± 0.10 |           |
|                              | Gadolinium            | 1.61 ± 0.08 | 1.54 ± 0.05 |           | 1.20 ± 0.43 |           |
| Human PC5 cell               | Normal                | 1.91 ± 0.72 | 0.37 ± 0.06 |           | 0.33 ± .06  |           |
|                              | Gadolinium            | 1.59±0.08   | 0.57±0.50   |           | 0.26±0.13   |           |
| Mouse brain endothelial cell |                       | 52          |             | 6         | 52          | 1.35 [24] |
| Chinese hamster ovary cell   |                       | 23.2        |             | 1         | 120         | 1.50 [25] |
|                              | Normal                |             |             |           |             |           |
| Mouse embryonic stem cell    | Fixation              |             |             |           | 1.02 ± 0.01 |           |
|                              | In isolation          | 0.15 ± 0.07 |             | 9.9 ± 1.7 | 1.35 ± 0.05 |           |
|                              | Differentiate at 0 h  |             |             |           | 1.55 ± 0.45 |           |
|                              | Differentiate at 24 h |             |             |           | 0.92 ± 0.20 | [26]      |
|                              | Differentiate at 48 h |             |             |           | 1.18 ± 0.40 |           |
|                              |                       |             |             |           | 1.82 ± 0.16 |           |
